# Supplementary material for: LytTR Regulatory Systems: A potential new class of prokaryotic sensory system
Source: PLoS Genet. 2018 Oct 8;14(10):e1007709. doi: 10.1371/journal.pgen.1007709 (PMC6193735; doi:10.1371/journal.pgen.1007709)
Supplement: S1 Table — *Em—erythromycin; Sp—spectinomycin; Km—kanamycin; Cm—chloramphenicol; 4-CP—p-chlorophenylalanine. (XLSX) [file pgen.1007709.s005.xlsx]

## Sheet: Sheet1
Table S1. Strains and plasmids used in this study
Strain	Relevant characteristics*	Reference
DH5a	E. coli cloning strain
BL21(DE3)pLysS	F– ompT gal dcm lon hsdSB(rB–mB–) λ(DE3 [lacI lacUV5-T7p07 ind1 sam7 nin5]) [malB+]K-12(λS) pLysS[T7p20 orip15A](CmR)
E coli pMalC9	pMAL-cri expressing the Himar1 transposase cloned as a maltose binding protein (MBP) fusion in E. coli	61
UA140	Wild-type S. mutans	53
ldhRenGSm	UA159::F(ldhrbs – optimized green renilla luc); 4-CPR	55
294-295-RenG	UA140::FSMU_294/295-luc, EmR	This study
294-RenG	UA140::FSMU_294-luc, ∆SMU_295, EmR	This study
1070c-1069c-RenG	UA140::FSMU_1070c/1069c-luc, EmR	This study
1070c-RenG	UA140::FSMU_1070c-luc, ∆SMU_1069c, EmR	This study
hdrRM-RenG	UA140::FhdrRM-luc, EmR	This study
hdrR-RenG	UA140::FhdrR-luc, ∆hdrM, EmR	This study
brsRM-RenG	UA140::FbrsRM-luc, EmR	This study
brsR-RenG	UA140::FbrsR-luc, ∆brsM, EmR	This study
01-luc	UA159::FSMU_433/434-luc, SpR	Lab strain
01-luc-434	UA159::FSMU_433-luc, SpR	Lab strain
433-434-RenG	UA140::FSMU_433/434-luc, SpR	This study
433-RenG	UA140::FSMU_433-luc, SpR	This study
ifdLRS	UA140 DSMU_294/295, DSMU_433/434, DSMU_1070c/1069c, DhdrRM, DbrsRM	This study
ifdLRS/294-295-RenG	UA140::F(SMU_294/295-luc), DSMU_433/434, DSMU_1070c/1069c, DhdrRM, DbrsRM	This study
ifdLRS/433-434-RenG	UA140::F(SMU_433/434-luc), DSMU_294/295, DSMU_1070c/1069c, DhdrRM, DbrsRM	This study
ifdLRS/1070c-69c-RenG	UA140::F(SMU_1070c/1069c-luc), DSMU_294/295, DSMU_433/434, DhdrRM, DbrsRM	This study
ifdLRS/hdrRM-RenG	UA140::F(hdrRM-luc), DSMU_294/295, DSMU_433/434, DSMU_1070c/1069c, DbrsRM	This study
ifdLRS/brsRM-RenG	UA140::F(brsRM-luc), DSMU_294/295, DSMU_433/434, DSMU_1070c/1069c, DhdrRM	This study
d434/294-295-RenG	UA140 DSMU_1070c/1069c, DhdrRM, DbrsRM, SMU_434::aphAIII, SMU_294/295-luc; EmR, KmR	This study
d1069c/294-295-RenG	UA140 DSMU_433/434, DhdrRM, DbrsRM, SMU_1069c::aphAIII, SMU_294/295-luc; EmR, KmR	This study
dhdrM/294-295-RenG	UA140 DSMU_433/434, DSMU_1070c/1069c, DbrsRM, hdrM::aphAIII, SMU_294/295-luc; EmR, KmR	This study
dbrsM/294-295-RenG	UA140 DSMU_433/434, DSMU_1070c/1069c, DhdrRM, brsM::aphAIII, SMU_294/295-luc; EmR, KmR	This study
d295/433-434-RenG	UA140 DSMU_1070c/1069c, DhdrRM, DbrsRM, SMU_295::aphAIII, SMU_433/434-luc; SpR, KmR	This study
d1069c/433-434-RenG	UA140 DSMU_294/295, DhdrRM, DbrsRM, SMU_1069c::aphAIII, SMU_433/434-luc; SpR, KmR	This study
dhdrM/433-434-RenG	UA140 DSMU_294/295, DSMU_1070c/1069c, DbrsRM, hdrM::aphAIII, SMU_433/434-luc; SpR, KmR	This study
dbrsM/433-434-RenG	UA140 DSMU_294/295, DSMU_1070c/1069c, DhdrRM, brsM::aphAIII, SMU_433/434-luc; SpR, KmR	This study
d295/1070c-69c-RenG	UA140 DSMU_433/434, DhdrRM, DbrsRM, SMU_295::aphAIII, SMU_1070c/1069c-luc; EmR, KmR	This study
d434/1070c-69c-RenG	UA140 DSMU_294/295, DhdrRM, DbrsRM, SMU_434::aphAIII, SMU_1070c/1069c-luc; EmR, KmR	This study
dhdrM/1070c-69c-RenG	UA140 DSMU_294/295, DSMU_433/434, DbrsRM, hdrM::aphAIII, SMU_1070c/1069c-luc; EmR, KmR	This study
dbrsM/1070c-69c-RenG	UA140 DSMU_294/295, DSMU_433/434, DhdrRM, brsM::aphAIII, SMU_1070c/1069c-luc; EmR, KmR	This study
d295/hdrRM-RenG	UA140 DSMU_433/434, DSMU_1070c/1069c, DbrsRM, SMU_295::aphAIII, hdrRM-luc; EmR, KmR	This study
d434/hdrRM-RenG	UA140 DSMU_294/295, DSMU_1070c/1069c,DbrsRM, SMU_434::aphAIII, hdrRM-luc; EmR, KmR	This study
d1069c/hdrRM-RenG	UA140 DSMU_294/295, DSMU_433/434, DbrsRM, SMU_1069c::aphAIII, hdrRM-luc; EmR, KmR	This study
dbrsM/hdrRM-RenG	UA140 DSMU_294/295, DSMU_433/434, DSMU_1070c/1069c, brsM::aphAIII, hdrRM-luc; EmR, KmR	This study
d295/brsRM-RenG	UA140 DSMU_433/434, DSMU_1070c/1069c, DhdrRM, SMU_295::aphAIII, brsRM-luc; EmR, KmR	This study
d434/brsRM-RenG	UA140 DSMU_294/295, DSMU_1070c/1069c, DhdrRM, SMU_434::aphAIII, brsRM-luc; EmR, KmR	This study
d1069c/brsRM-RenG	UA140 DSMU_294/295, DSMU_433/434, DhdrRM, SMU_1069c::aphAIII, brsRM-luc; EmR, KmR	This study
dhdrM/brsRM-RenG	UA140 DSMU_294/295, DSMU_433/434, DSMU_1070c/1069c, hdrM::aphAIII, brsRM-luc; EmR, KmR	This study
d-smu434/UA140	UA140 SMU_434::Tn; KmR	Lab strain
d-smu1069/UA140	UA140 SMU_1069c::Tn; KmR	Lab strain
RMIFDC2	UA140 hdrRM::IFDC2, EmR, 4-CPS	This study
LZ89-luc	UA140::pLZ1689-luc; SpR	26
Rp+1luc	UA140::F(hdrRP–firefly luc[+1 site]) DhdrRM	This study
Rp-10mluc	UA140::F(hdrRP–firefly luc[+1 site and -10 mutated]) DhdrRM	This study
Rp+1lucROE	Rp+1luc + pHdrRoe; SpR	This study
Rp+1lucROE-10	Rp-10mluc + pHdrRoe; SpR	This study
RpLuc	UA140::F(hdrRP–firefly luc) DhdrRM	This study
RpDRmluc	UA140::F(hdrRP–firefly luc[Direct Repeat mutated]), DhdrRM; SpR	This study
RMlucIFDC2	RpLuc::IFDC2; EmR; 4-CPS	This study
hdrRMluc	UA140::F(hdrRM–firefly luc)	This study
dhdrMluc	UA140::F(hdrRP–firefly luc) DhdrM; SpR	This study
dhdrMdDRluc	UA140::F(hdrRP–firefly luc[Direct Repeat mutated]), DhdrM; SpR	This study
RMOE	RpLuc + pJYROE + pMOE; EmR; SpR	This study
ROE	RpLuc + pJYROE; EmR	This study
ROE/DR-	RpDRmluc + pJYROE; EmR, SpR	This study
ifdLRS/brsRM(IFDC2)	UA140 DSMU_294/295, DSMU_433/434, DSMU_1070c/1069c, DhdrRM, brsRM::IFDC2; EmR	This study
ifdLRS/brsRM-gusA	UA140::F(brsRM-luc), DSMU_294/295, DSMU_433/434, DSMU_1070c/1069c, DhdrRM	This study
ifdLRS/brsRMp-gusA	UA140::F(brsRP-luc), DSMU_294/295, DSMU_433/434, DSMU_1070c/1069c, DhdrRM, DbrsRM	This study
Tn3	ifdLRS/brsRM-gusA tilSY417::Tn, EmR	This study
Tn46	ifdLRS/brsRM-gusA rpoBD1137::Tn, EmR	This study
Tn7	ifdLRS/brsRM-gusA SMU_2060-2061::Tn, EmR	This study
Tn45	ifdLRS/brsRM-gusA rgpDL244::Tn, EmR	This study
Tn18	ifdLRS/brsRM-gusA SMU_1089D29::Tn, EmR	This study
Tn43	ifdLRS/brsRM-gusA SMU_1406cI71::Tn, EmR	This study
Tn19	ifdLRS/brsRM-gusA SMU_608V107::Tn, EmR	This study
Tn27	ifdLRS/brsRM-gusA SMU_1193T50::Tn, EmR	This study
Tn24	ifdLRS/brsRM-gusA SMU_1235I363::Tn, EmR	This study
Tn40	ifdLRS/brsRM-gusA SMU_1297L265::Tn, EmR	This study
Tn42	ifdLRS/brsRM-gusA comEH80::Tn, EmR	This study
dTn3	ifdLRS/brsRMp-gusA tilSY417::Tn, EmR	This study
dTn46	ifdLRS/brsRMp-gusA rpoBD1137::Tn, EmR	This study
dTn7	ifdLRS/brsRMp-gusA SMU_2060-2061::Tn, EmR	This study
dTn45	ifdLRS/brsRMp-gusA rgpDL244::Tn, EmR	This study
dTn18	ifdLRS/brsRMp-gusA SMU_1089D29::Tn, EmR	This study
dTn43	ifdLRS/brsRMp-gusA SMU_1406cI71::Tn, EmR	This study
dTn19	ifdLRS/brsRMp-gusA SMU_608V107::Tn, EmR	This study
dTn27	ifdLRS/brsRMp-gusA SMU_1193T50::Tn, EmR	This study
dTn24	ifdLRS/brsRMp-gusA SMU_1235I363::Tn, EmR	This study
dTn40	ifdLRS/brsRMp-gusA SMU_1297L265::Tn, EmR	This study
dTn42	ifdLRS/brsRMp-gusA comEH80::Tn, EmR	This study
Plasmid	Relevant Characteristics*	Reference
pET29b	E. coli recombinant protein expression vector; KmR	Invitrogen
pJY4164	Streptococcal suicide vector; EmR	56
pDL278	E. coli-Streptococcus shuttle vector; SpR	59
pEcROE	pET29b::F(hdrR ORF); KmR	This study
pHdrRoe	pDL278::F(ldhP-hdrR); SpR	27
pJYROE	pJY4164::F(ldhP-hdrR); EmR	This study
pMOE	pDL278::F(ldhP-hdrM); SpR	This study
pWVKTs	Temperature sensitive shuttle vector, KmR	58
pZX7	pVA380::hdrRP::gusA, Spr	60
pGEMÒ-T	Cloning vector	Promega
pT-MGL-erm	pGEMÒ-T::F(Tn-ermAM); EmR	This Study
*Em - erythromycin; Sp - spectinomycin; Km - kanamycin; Cm - chloramphenicol; 4-CP - p-chlorophenylalanine
References
26. Merritt J, Zheng L, Shi W, Qi F. Genetic characterization of the hdrRM operon: a novel high-cell-density-responsive regulator in Streptococcus mutans. Microbiology. 2007;153(Pt 8):2765-73. doi: 10.1099/mic.0.2007/007468-0. PubMed PMID: 17660440.
27. Okinaga T, Niu G, Xie Z, Qi F, Merritt J. The hdrRM operon of Streptococcus mutans encodes a novel regulatory system for coordinated competence development and bacteriocin production. J Bacteriol. 2010;192(7):1844-52. doi: 10.1128/JB.01667-09. PubMed PMID: 20118256; PubMed Central PMCID: PMCPMC2838059.
53. Qi F, Chen P, Caufield PW. The group I strain of Streptococcus mutans, UA140, produces both the lantibiotic mutacin I and a nonlantibiotic bacteriocin, mutacin IV. Appl Environ Microbiol. 2001;67(1):15-21. Epub 2001/01/03. doi: 10.1128/AEM.67.1.15-21.2001. PubMed PMID: 11133423; PubMed Central PMCID: PMCPMC92506.
55. Merritt J, Senpuku H, Kreth J. Let there be bioluminescence: development of a biophotonic imaging platform for in situ analyses of oral biofilms in animal models. Environ Microbiol. 2016;18(1):174-90. doi: 10.1111/1462-2920.12953. PubMed PMID: 26119252; PubMed Central PMCID: PMCPMC5050008.
56. Achen MG, Davidson BE, Hillier AJ. Construction of plasmid vectors for the detection of streptococcal promoters. Gene. 1986;45(1):45-9. Epub 1986/01/01. PubMed PMID: 3536665.
58. Gutierrez JA, Crowley PJ, Brown DP, Hillman JD, Youngman P, Bleiweis AS. Insertional mutagenesis and recovery of interrupted genes of Streptococcus mutans by using transposon Tn917: preliminary characterization of mutants displaying acid sensitivity and nutritional requirements. J Bacteriol. 1996;178(14):4166-75. Epub 1996/07/01. PubMed PMID: 8763945; PubMed Central PMCID: PMCPMC178174.
59. Chen YY, LeBlanc DJ. Genetic analysis of scrA and scrB from Streptococcus sobrinus 6715. Infect Immun. 1992;60(9):3739-46. Epub 1992/09/01. PubMed PMID: 1500184; PubMed Central PMCID: PMCPMC257385.
60. Xie Z, Qi F, Merritt J. Cloning-independent plasmid construction for genetic studies in streptococci. J Microbiol Methods. 2013;94(2):77-82. doi: 10.1016/j.mimet.2013.05.005. PubMed PMID: 23673081; PubMed Central PMCID: PMCPMC3720822.
61. van Opijnen T, Lazinski DW, Camilli A. Genome-Wide Fitness and Genetic Interactions Determined by Tn-seq, a High-Throughput Massively Parallel Sequencing Method for Microorganisms. Curr Protoc Mol Biol. 2014;106:7 16 1-24. Epub 2014/04/16. doi: 10.1002/0471142727.mb0716s106. PubMed PMID: 24733243; PubMed Central PMCID: PMCPMC4568079.
